# Supplementary material for: Dissolved greenhouse gas (CO2, CH4, and N2O) emissions from highland lakes of the Andes cordillera in Northern Ecuador
Source: Springer Nature journal article supplement (doi:10.1007/s00027-023-01039-6), 2024-01-08
Supplement: MOESM1 [file 27_2023_1039_MOESM1_ESM.doc]

**Supplementary material**

**Dissolved greenhouse gas (CO2, CH4, N2O) emissions from highland lakes of the Andes cordillera in Northern Ecuador**

Gonzalo Chiriboga1,2, Steven Bouillon3, Alberto V. Borges1,*

1 Chemical Oceanography Unit, University of Liège, Liège, Belgium

2 Facultad de Ingeniería Química, Universidad Central del Ecuador; Ritter s/n y Bolivia, Quito, Ecuador

3 Department of Earth and Environmental Sciences, KU Leuven, 3001 Leuven, Belgium

* alberto.borges@uliege.be

**Table S1:** Major cations (Na+, K+, Mg2+, Ca2+, relative analytical precision of ±4.1%, ±4.9%, ±3.8%, ±2.8%, respectively) (in mg L-1 and µequivalents L-1) in surface waters of fifteen highland lakes in Northern Ecuador (Fig. 1).

|  | Na+ | K+ | Mg2+ | Ca2+ | Na+ | K+ | Mg2+ | Ca2+ | Cation sequence |
| --- | --- | --- | --- | --- | --- | --- | --- | --- | --- |
|  | mg L-1 | mg L-1 | mg L-1 | mg L-1 | µeq L-1 | µeq L-1 | µeq L-1 | µeq L-1 |  |
| Cubilche 1 | 1.6 | 1.2 | 0.6 | 1.7 | 69 | 30 | 48 | 84 | Ca2+>Na+>Mg2+>K+ |
| Cubilche 2 | 1.6 | 1.4 | 0.6 | 1.8 | 70 | 35 | 51 | 88 | Ca2+>Na+>Mg2+>K+ |
| Cuicocha | 62.3 | 5.7 | 34.6 | 44.4 | 2,709 | 145 | 2,845 | 2,216 | Na+>Ca2+>Mg2+>K+ |
| Humbolt | 16.4 | 5.0 | 9.2 | 9.7 | 711 | 128 | 760 | 485 | Na+>Ca2+>Mg2+>K+ |
| Loreto | 60.6 | 5.8 | 34.2 | 43.7 | 2,637 | 149 | 2,814 | 2,179 | Na+>Ca2+>Mg2+>K+ |
| Mojanda | 1.7 | 1.2 | 0.6 | 1.6 | 73 | 30 | 48 | 78 | Ca2+>Na+>Mg2+>K+ |
| Negra | 1.8 | 1.3 | 0.6 | 1.6 | 78 | 33 | 50 | 81 | Ca2+>Na+>Mg2+>K+ |
| Papallacta | 60.6 | 5.7 | 34.4 | 43.7 | 2,637 | 145 | 2,828 | 2,182 | Na+>Ca2+>Mg2+>K+ |
| Salve facha | 10.2 | 1.5 | 2.2 | 7.4 | 445 | 38 | 184 | 369 | Na+>Ca2+>Mg2+>K+ |
| San Pablo | 23.7 | 4.0 | 12.7 | 16.9 | 1,032 | 104 | 1,046 | 845 | Na+>Ca2+>Mg2+>K+ |
| Santa lucía | 1.6 | 1.2 | 0.6 | 1.8 | 71 | 31 | 52 | 88 | Ca2+>Na+>Mg2+>K+ |
| Secas | 10.6 | 3.3 | 5.8 | 6.9 | 459 | 83 | 475 | 343 | Na+>Ca2+>Mg2+>K+ |
| Sucus | 1.64 | 1.18 | 0.58 | 1.60 | 71 | 30 | 48 | 80 | Ca2+>Na+>Mg2+>K+ |
| Yaguarcocha | 24.0 | 4.2 | 12.7 | 17.0 | 1,045 | 107 | 1,046 | 848 | Na+>Ca2+>Mg2+>K+ |
| Yanacocha | 1.57 | 1.19 | 0.58 | 1.58 | 68 | 30 | 48 | 79 | Ca2+>Na+>Mg2+>K+ |

**Table S2:** Equations and statistics at 0.05 level of curve fits of data shown in Figures.

**Figure S1:** Major cations (K+, Mg2+, Ca2+ in mg L-1, relative analytical precision of ±4.9%, ±3.8%, ±5.8%, respectively), dissolved silica (DSi) (mg L-1,relative analytical precision of ±5.8%), total alkalinity (TA in mmol L-1,analytical precision of ±0.003 mmol L-1) and Fe (µg L-1, relative analytical precision of ±4.6%) *versus* Na+ (in mg L-1, relative analytical precision of ±4.1%) in surface waters of fifteen highland lakes in Northern Ecuador (Fig. 1). Solid grey lines show fits to the data (Table S2).

**Figure S2:** Fe (µg L-1, relative analytical precision of ±4.6%) *versus* disolved organic carbon (DOC in mg L-1,relative analytical precision of ±5%)) in surface waters of fifteen highland lakes in Northern Ecuador (Fig. 1). Solid grey line shows fit to the data (Table S2).

**Figure S3:** Stable isotope composition of H and O of H2O (δ18O-H2O and δ2H-H2O in ‰, analytical precision of ±0.1‰ and ±2.0‰, respectively) in surface waters of fifteen highland lakes in Northern Ecuador (Fig. 1). Solid grey line shows fit to the data (Table S2) and gives the local evaporative line (LEL). Dotted line is the local meteoric water line (LMWL) (Inguaggiato et al. 2010).

**Figure S4:** Partial pressure of CO2 (pCO2 in ppm, relative analytical precision ±5.2%) and the ratio of HCO3-+CO32- to dissolved inorganic carbon (DIC) (mol:mol) *versus* the stable isotope composition of DIC (δ13C-DIC in ‰, analytical precision ±0.2‰) in surface waters of fifteen highland lakes in Northern Ecuador (Fig. 1). Solid grey lines show fits to the data (Table S2).

**Figure S5:** Partial pressure of CO2 (pCO2 in ppm, relative analytical precision ±5.2%) and dissolved CH4 concentration (nmol L-1,relative analytical precision ±10.9%) *versus* water temperature (Temp. °C, analytical precision ±0.1°C) in the sampled highland lakes in Northern Ecuador (excluding lakes Cuicocha, Loreto and Papallacta influenced by volcanic inputs) and in lowland floodplain lakes of the Amazon basin gathered from literature (Abril et al. 2013; Albéric et al. 2018; Amaral et al. 2020; Barbosa et al. 2016; Mitchell et al. 2018). For pCO2 only data directly measured by equilibration were compiled, data computed from pH and total alkalinity were excluded as they can be prone to large errors (Abril et al. 2015). Albeit statistically significant, both relations are most probably spurious and indirectly reflect elevational variations of other drivers (see text). Dotted horizontal lines indicate equilibrium with the atmosphere and solid grey lines show fits to the data (Table S2).

**Figure S6:** Lake counts and cumulated lake surface area (km2) as function of elevation (in m by bins of 500 m) in the Amazon basin from the HydroLAKES spatial data-set (Messager et al. 2016). The average lake surface area was significantly lower in highlands (elevation > 500 m, average 0.9±5.5 km2) than in lowlands (elevation < 500 m, average 0.9±5.5 km2) (1.8±15.5 km2) (Mann-Whitney test *p* <0.0001).
